# Supplementary material
Source: PubMed Central journal article supplement (PMC7482234)
Supplement: ao0c02311_si_001.pdf [file ao0c02311_si_001.pdf]

## Supporting information

### **Eco-efficient green seaweed *Codium decorticaum* biosorbent for textile dyes: Characterization, mechanism, recyclability and RSM optimization**

Hicham Abou Oualid <sup>a</sup>, Youness Abdellaoui <sup>b</sup>, Mohamed Laabd <sup>c,\*</sup>, Mahmoud El Ouardi <sup>a,d</sup>,

Younes Brahmi <sup>e</sup>, Mohamed Iazza <sup>f</sup>, Jaouad Abou Oualid <sup>f</sup>

<sup>a</sup> *Laboratory of Biotechnology, Materials and Environment, Faculty of Sciences, Ibn Zohr University, Agadir, Morocco. Email: [h.abououalid@gmail.com](mailto:h.abououalid@gmail.com)*

<sup>b</sup> *Faculty of Engineering, Environmental Engineering Department, Autonomous University of Yucatan, Mexico*

<sup>c</sup> *Laboratory of Materials and Environment, Faculty of Sciences, Ibn Zohr University, Agadir, Morocco.*

<sup>d</sup> *Faulty of Applied Sciences, Ibn Zohr University, B.P 86150, Ait Melloul, Morocco.*

<sup>e</sup> *Materials Science and Nanoengineering Department, Mohamed VI Polytechnic University, B.P 43150, Benguerir, Morocco.*

<sup>f</sup> *Laboratory of Aquatic Ecosystems: Marine and Continental (AQUAMAR), Faculty of Sciences, Ibn Zohr University, PO Box 8106, Dakhla, Agadir, Morocco*

\*Corresponding author: (M. Laabd) [mohamed.laabd@edu.uiz.ac.ma](mailto:mohamed.laabd@edu.uiz.ac.ma)

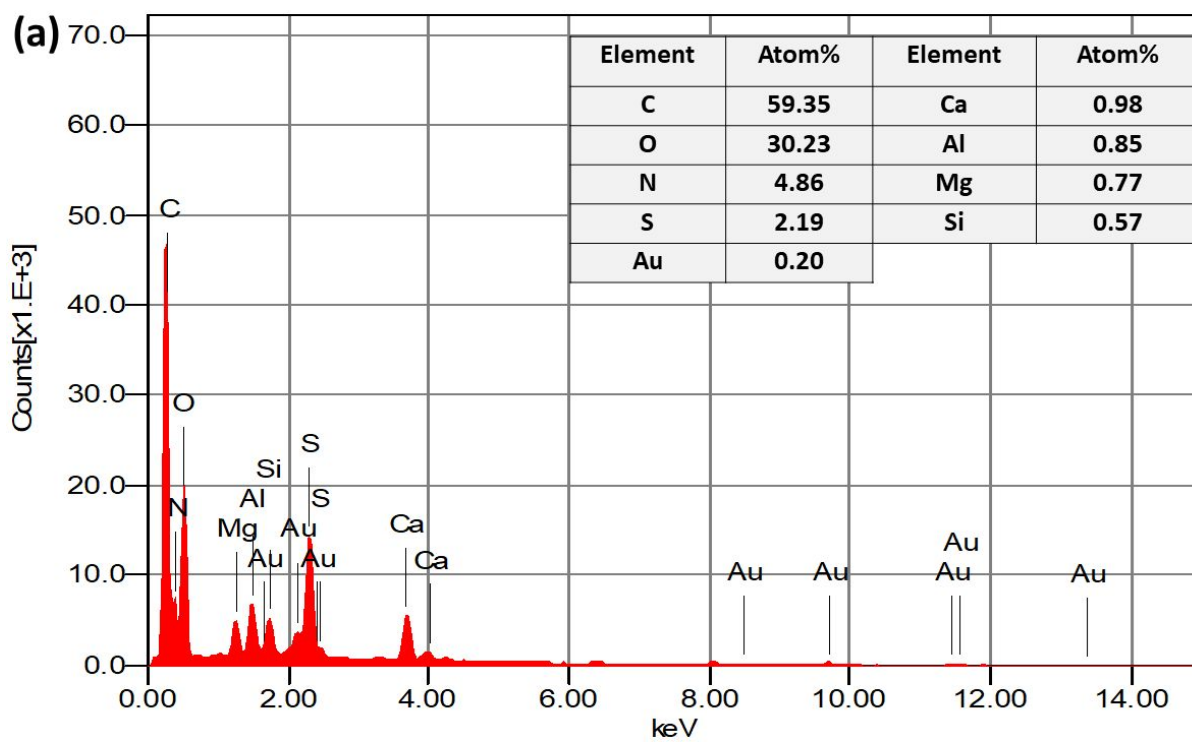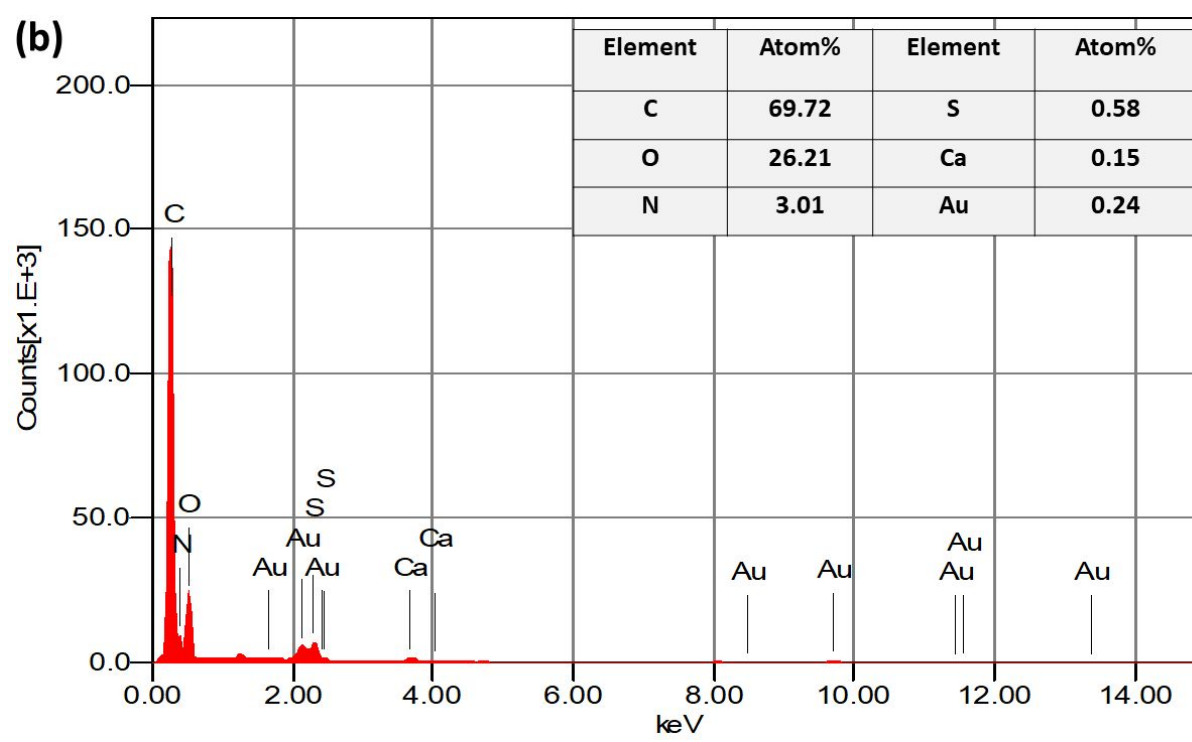

**Figure S1.** SEM-EDS spectra of CDA after adsorption (a) CR and (b) CV dyes.
